# Supplementary material for: Characteristics of peripheral immune response induced by large-vessel occlusion in patients with acute ischemic stroke
Source: PubMed Central journal article supplement (PMC11666556; doi:10.3389/fneur.2024.1512720), 2024-12-10
Supplement: Data_Sheet_1.pdf [file Data_Sheet_1.pdf]

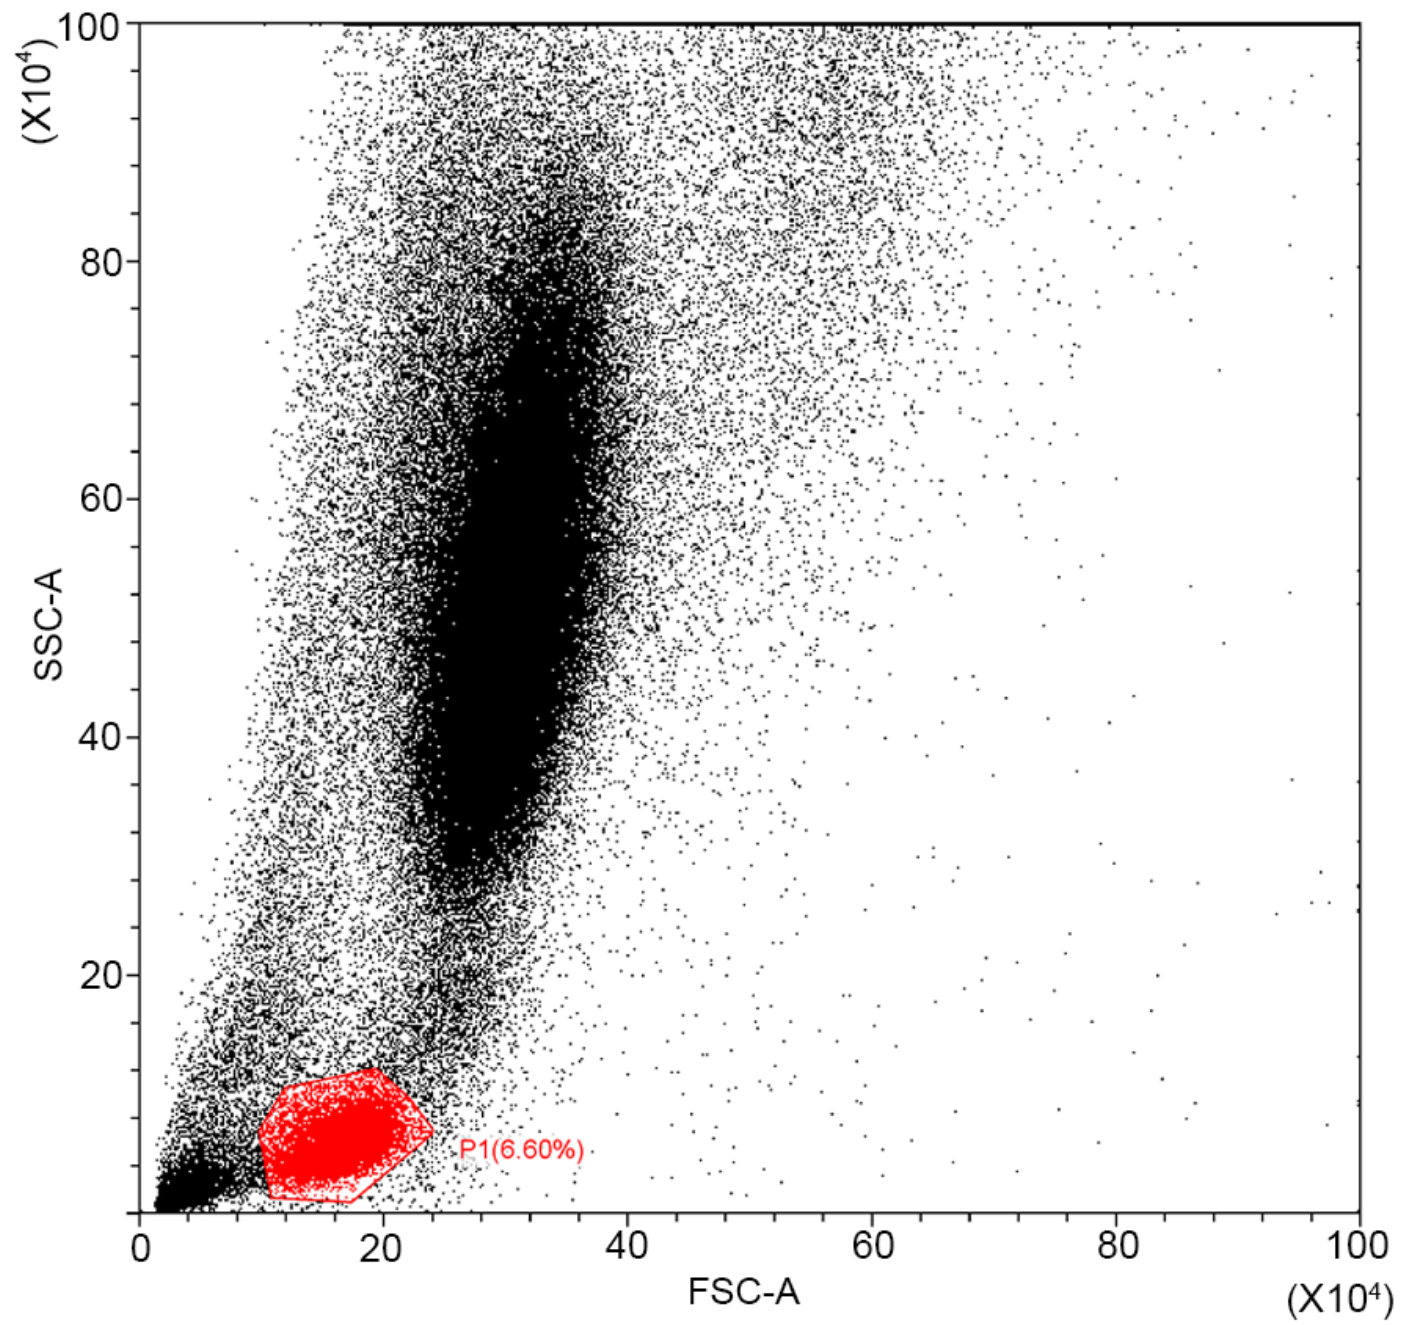

**Supplemental Figure 1.** Gating strategy for the population of lymphocyte in peripheral whole blood. The representative assay was performed with the fresh blood sample of a patient with LVO.
